# Supplementary material for: Proton–electron mass ratio by high-resolution optical spectroscopy of ion ensembles in the resolved-carrier regime
Source: Springer Nature journal article supplement (doi:10.1038/s41567-020-01150-7), 2021-02-18
Supplement: 41567_2020_1150_MOESM1_ESM.pdf [file 41567_2020_1150_MOESM1_ESM.pdf]

---

**Supplementary information**

---

**Proton–electron mass ratio by high-resolution optical spectroscopy of ion ensembles in the resolved-carrier regime**

---

In the format provided by the authors and unedited

**Supplementary Information for “Proton-electron mass ratio by  
high-resolution optical spectroscopy of ion ensembles in the  
resolved-carrier regime”**

I. Kortunov,<sup>1</sup> S. Alighanbari,<sup>1</sup> M. G. Hansen,<sup>1</sup> G. S. Giri,<sup>1</sup> V. I. Korobov,<sup>2</sup> and S. Schiller<sup>1,\*</sup>

*<sup>1</sup>Institut für Experimentalphysik, Heinrich-Heine-Universität*

*Düsseldorf, 40225 Düsseldorf, Germany*

*<sup>2</sup>Bogoliubov Laboratory of Theoretical Physics,*

*Joint Institute for Nuclear Research, 141980 Dubna, Russia*

---

\* Corresponding Author, e-mail: step.schiller@hhu.de

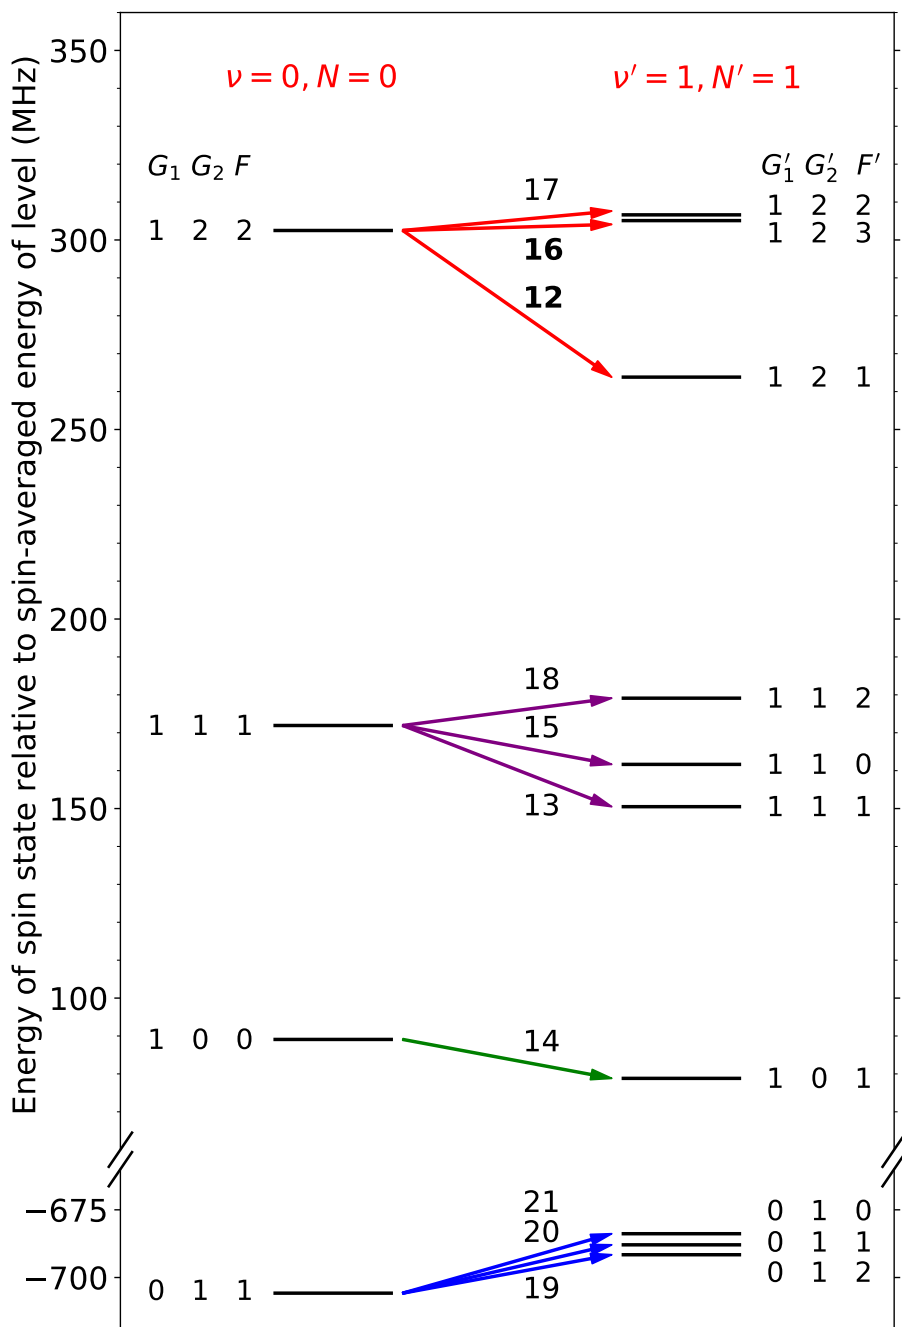

Supplementary Figure 1. **Hyperfine structure energy levels of HD<sup>+</sup> in the two relevant levels.** Shown are the ground vibrational level ( $\nu = 0, N = 0$ ) (left) and the first excited vibrational level ( $\nu' = 1, N' = 1$ ) (right) of the  $^2\Sigma_g^+$  electronic state. The numbers next to the arrows indicate the line numbers. In this work, lines 12 and 16 were detected and measured.

|          |                                      | $\mathcal{E}'_1$ | $\mathcal{E}'_2$ | $\mathcal{E}'_3$ | $\mathcal{E}'_4$ | $\mathcal{E}'_5$ | $\mathcal{E}'_6$ | $\mathcal{E}'_7$ | $\mathcal{E}'_8$ | $\mathcal{E}'_9$ | $\mathcal{E}_4$ | $\mathcal{E}_5$ |
|----------|--------------------------------------|------------------|------------------|------------------|------------------|------------------|------------------|------------------|------------------|------------------|-----------------|-----------------|
|          |                                      | 30.28083         | -0.03046         | -0.004664        | 903.36802        | 138.91049        | 8.13669          | 1.24894          | -0.002945        | 0.005659         | 925.39588       | 142.28781       |
| Line $i$ | $f_{\text{spin},i}^{(\text{theor})}$ | $\gamma'_{i,1}$  | $\gamma'_{i,2}$  | $\gamma'_{i,3}$  | $\gamma'_{i,4}$  | $\gamma'_{i,5}$  | $\gamma'_{i,6}$  | $\gamma'_{i,7}$  | $\gamma'_{i,8}$  | $\gamma'_{i,9}$  | $\gamma_{i,4}$  | $\gamma_{i,5}$  |
| 12       | -38.68609                            | -0.575           | -0.565           | -1.715           | 0.250            | 0.430            | -0.011           | -3.369           | -3.306           | -2.909           | 0.250           | 0.500           |
| 16       | 2.60772                              | 0.500            | 0.500            | 1.000            | 0.250            | 0.500            | -0.500           | -1.000           | -1.000           | -0.500           | 0.250           | 0.500           |

Supplementary Table 1. **Spin hamiltonian coefficients, spin structure frequencies, and spin frequency derivatives.**  $\mathcal{E}'_k$  are the coefficients of the spin Hamiltonian [45] for the  $(v' = 1, N' = 1)$  level, in MHz.  $\mathcal{E}_k$  are the coefficients for the ro-vibrational ground state  $(v = 0, N = 0)$ , already reported in [13].  $f_{\text{spin}}^{(\text{theor})}$  is the theoretical spin structure frequency in MHz.  $\gamma$  are the dimensionless sensitivities of the spin structure frequencies to the various spin Hamiltonian coefficients.  $\gamma'_{i,k} = \partial f_{\text{spin},i}^{(\text{theor})} / \partial \mathcal{E}'_k$  refers to the upper state,  $\gamma_{i,k} = -\partial f_{\text{spin},i}^{(\text{theor})} / \partial \mathcal{E}_k$  to the lower state.

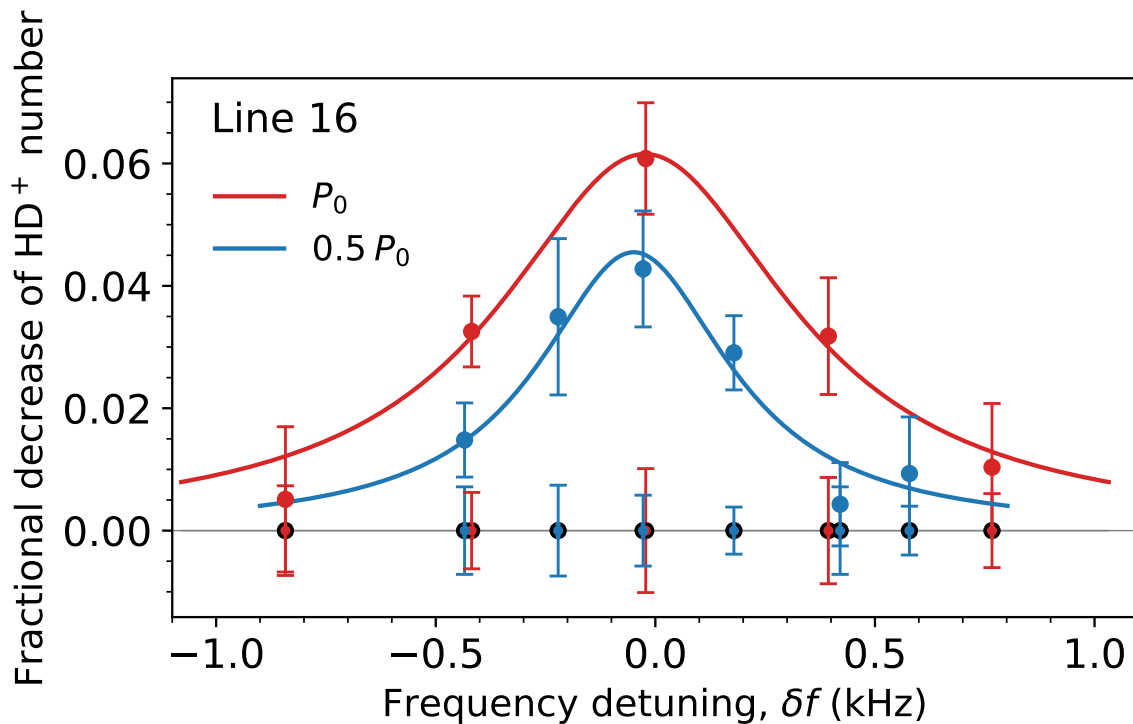

Supplementary Figure 2. **Power broadening of one Zeeman component of the vibrational transition.** The  $m_F = 0 \rightarrow m'_F = 0$  component of line 16 was interrogated at two power settings of the  $5.1 \mu\text{m}$  spectroscopy laser. Here,  $B \simeq 0.6 \text{ G}$ . The zero of the frequency detuning is arbitrary.  $P_0$  is the nominal power used in the measurements shown in the main text. Each error bar represents the standard deviation of the mean.

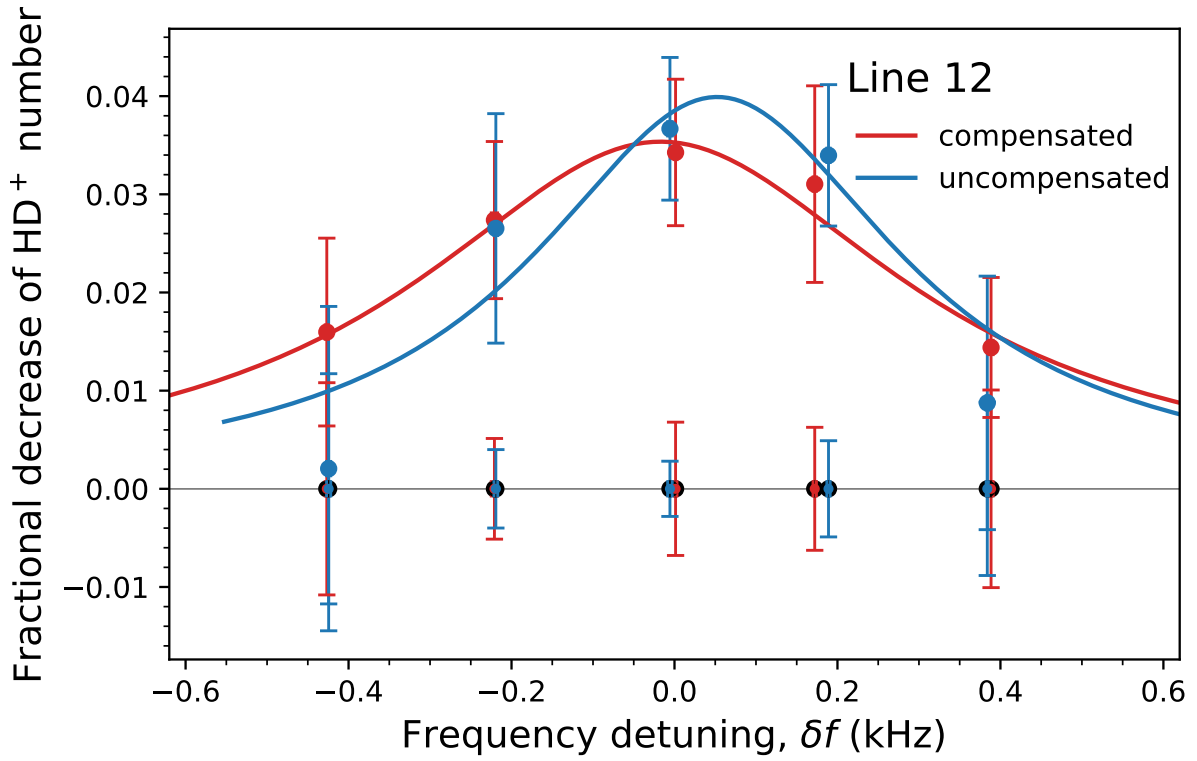

Supplementary Figure 3. **The effect of a displacement of the beryllium ion cluster from the trap axis.** One Zeeman component of the vibrational transition is measured with the beryllium ion cluster aligned with the trap axis (red) and with the cluster significantly shifted radially (blue). The  $m_F = 0 \rightarrow m'_F = 0$  component of line 12 is shown. The zero of the frequency detuning is arbitrary. Each error bar represents the standard deviation of the mean.
